# Supplementary material for: Regenerating heavily biofouled dissolved oxygen sensors using bacterial viruses
Source: Royal Society of Chemistry journal article supplement (doi:10.1039/d0ra10156g), 2021-01-01
Supplement: d0ra10156g1.pdf [file d0ra10156g1.pdf]

## Supplementary Information

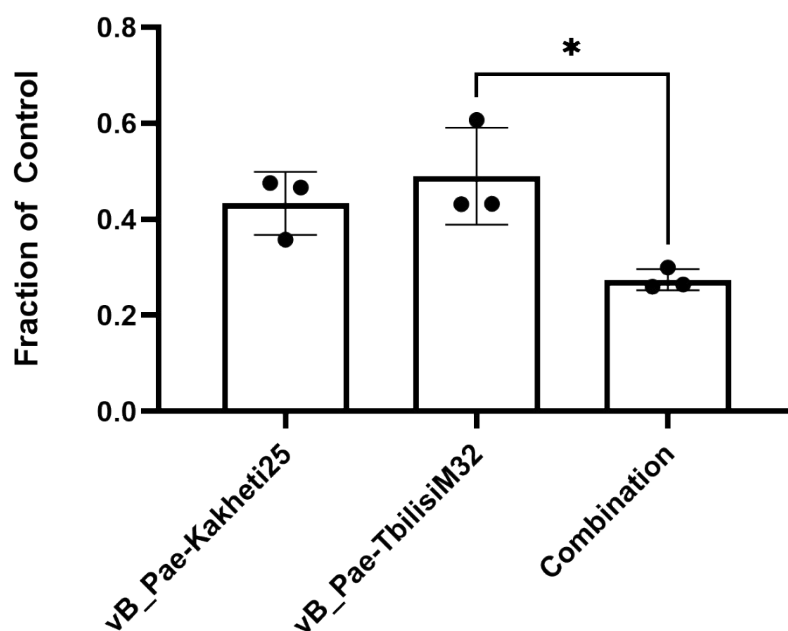

**Figure S1.** PA biofilm removal (compared to the no-phage control) in a microtiter plate after treating a 4-day PA biofilm with single phages or a phage mixture, quantified as absorbance of re-solubilized crystal violet stain at 590 nm. Shown are the data point (the average of 10 technical replicates) for three independent biological replicates.
